# Supplementary material for: Traditional foods and 25(OH)D concentrations in a subarctic First Nations community
Source: PubMed Central journal article supplement (PMC5035507; doi:10.3402/ijch.v75.31956), 2016-09-22
Supplement: IJCH-75-31956-s002.pdf [file IJCH-75-31956-s002.pdf]

## SUPPLEMENTARY TABLES

**Table S1. Factor Loadings for each food as listed on the 36-item FFQ**

| FFQ Items                             | Balanced Market Foods | Western diet-market foods | Traditional Foods |
|---------------------------------------|-----------------------|---------------------------|-------------------|
| Fish                                  | 1                     | -17                       | 48*               |
| Moosemeat                             | 3                     | 3                         | 40*               |
| Beef /steak / hamburger               | 3                     | 44*                       | -14               |
| Pork chops or bacon                   | 12                    | 44*                       | 0                 |
| Chicken                               | 13                    | 33*                       | 3                 |
| Duck or goose                         | -4                    | 0                         | 60*               |
| Rabbit                                | -2                    | 9                         | 59*               |
| Klik or spork                         | -12                   | 34*                       | 28                |
| Eggs                                  | 3                     | 40*                       | -7                |
| Butter/lard                           | 2                     | 27                        | 10                |
| Margarine                             | 14                    | 9                         | -4                |
| Cold cereals                          | 34*                   | 31*                       | -8                |
| Hot cereals                           | 30*                   | -6                        | 17                |
| Beans                                 | 12                    | 7                         | 25                |
| White bread                           | -1                    | 35*                       | 1                 |
| Whole wheat bread                     | 32*                   | -2                        | 6                 |
| Bannock                               | 5                     | 9                         | 28                |
| Macaroni or other pasta               | 14                    | 22                        | 5                 |
| Indian medicine or Indian tea         | -7                    | -6                        | 39*               |
| Home-made soup                        | 23                    | 6                         | 31*               |
| Chips or French fries                 | 0                     | 65*                       | -4                |
| Other potatoes                        | 33*                   | 18                        | 2                 |
| Peas                                  | 64*                   | -6                        | -2                |
| Corn                                  | 61*                   | 5                         | -2                |
| Carrots                               | 67*                   | -8                        | 2                 |
| Other vegetables                      | 64*                   | -9                        | 3                 |
| Wild berries                          | 22                    | 0                         | 31*               |
| Fresh fruit from the store            | 37*                   | 3                         | 11                |
| Canned fruit                          | 13                    | 34*                       | 15                |
| Milk                                  | 34*                   | 15                        | -12               |
| Carnation milk                        | -4                    | 8                         | 17                |
| Pop/soda                              | -5                    | 42*                       | -9                |
| Tea/coffee                            | -12                   | -2                        | 8                 |
| Cookies/cake/Pastries                 | -3                    | 36*                       | 17                |
| Chocolate/ candy or bars              | -7                    | 39*                       | 17                |
| Fried food from fast food restaurants | -4                    | 47*                       | 2                 |

Three-factor factor analysis solution with orthogonal rotation; Eigenvalues (loadings) shown as eigenvalue\*100 for simplicity; Loadings  $\geq 30$  \*

**Table S2. Multivariate linear regression analysis of 25(OH)D with core variables: sensitivity analysis of adiposity measures: body fat percentage, waist circumference and waist to hip ratio**

| <b>Variables</b>       | <b>Model 1</b> | <b>Model 2</b> | <b>Model 3</b> | <b>Model 4</b> |
|------------------------|----------------|----------------|----------------|----------------|
| <b>Core Variables:</b> |                |                |                |                |
| Age                    | 0.14 (0.03)†   | 0.13 (0.04) †  | 0.16 (0.04) †  | 0.14 (0.04) †  |
| Sex                    | 1.24 (0.96)    | 0.93 (1.28)    | -1.88 (0.95)*  | -2.49 (1.06)*  |
| TV hours/day           | -0.70 (0.21)‡  | -0.79 (0.22) † | -0.69 (0.21) ‡ | -0.74 (0.21) † |
| Season                 | 4.54 (0.84)†   | -4.71 (0.90) † | -4.61 (0.84) † | -4.57 (0.85) † |
| MET hours/week         | 0.01 (0.004)†  | 0.01 (0.005) † | 0.01 (0.004)†  | 0.01 (0.004) † |
| BMI                    | -0.24 (0.07)‡  |                |                |                |
| Body fat percentage    |                | -9.78 (3.67) ‡ |                |                |
| Waist circumference    |                |                | -0.12 (0.03) † |                |
| Waist to hip ratio     |                |                |                | -10.33 (6.45)  |

\* p < 0.05 , ‡ p < 0.01, † p < 0.001

Data are beta estimates (standard errors)

**Table S3. Multiple linear regression analysis of 25(OH)D: sensitivity analysis excluding participants with T2DM**

| Variables                           | Model 1<br>β (Standard Error) | Model 2<br>β (Standard Error) | Model 3<br>β (Standard Error) | Model 4<br>β (Standard Error) | Model 5<br>β (Standard Error) | Model 6<br>β (Standard Error) |
|-------------------------------------|-------------------------------|-------------------------------|-------------------------------|-------------------------------|-------------------------------|-------------------------------|
| <b>Core Variables:</b>              |                               |                               |                               |                               |                               |                               |
| Age                                 | 0.16 (0.03)†                  | 0.06 (0.05)                   | 0.14 (0.04)†                  | 0.14 (0.04)†                  | 0.13 (0.04)†                  | 0.15 (0.04)†                  |
| Sex                                 | 1.68 (1.04)                   | 2.59 (1.14)*                  | 1.63 (1.04)                   | 1.62 (1.04)                   | 1.91 (1.05)                   | 1.40 (1.08)                   |
| TV hours/day                        | -0.66 (0.21)‡                 | -0.64 (0.24)‡                 | -0.61 (0.23)‡                 | -0.60 (0.23)‡                 | -0.66 (0.23)‡                 | -0.63 (0.23)‡                 |
| Season                              | 3.93 (0.93)†                  | 4.34 (0.98)†                  | 4.07 (0.92)†                  | 4.09 (0.92)†                  | 3.82 (0.92)†                  | 3.85(0.85)†                   |
| MET hours/week                      | 0.02 (0.005)‡                 | 0.01 (0.005)*                 | 0.01 (0.005)†                 | 0.01 (0.005)‡                 | 0.02 (0.005)†                 | 0.01 (0.005)‡                 |
| BMI                                 | -0.19 (0.08)*                 | -0.20 (0.08)*                 | -0.19 (0.08)*                 | -0.19 (0.08)*                 | -0.17 (0.07)*                 | -0.19 (0.08)*                 |
| Balanced Market Foods pattern       |                               | 0.67 (0.53)                   |                               |                               |                               |                               |
| Western-Diet Foods pattern          |                               | -1.32 (0.61)*                 |                               |                               |                               |                               |
| Traditional Foods pattern           |                               | 1.71 (0.57)‡                  |                               |                               |                               |                               |
| Wild Fish consumption (times/month) |                               |                               | 2.80 (1.26)*                  |                               |                               |                               |
| Wild Fish consumption**             |                               |                               |                               | 2.78 (1.25)*                  |                               |                               |
| Fried fish guts (times/month)       |                               |                               |                               |                               | 3.18 (1.39)                   |                               |
| Traditional activities (times/year) |                               |                               |                               |                               |                               | 0.01 (0.01)                   |

\* p < 0.05 , ‡ p < 0.01, † p < 0.001; \*\*Wildfish consumption excluding fried fish guts consumption ; Data are beta estimates (standard errors); sex=1 (male), 2= (female); season=1 (spring/summer), season=2 (fall/winter); \* p < 0.05 , ‡ p < 0.01, † p < 0.001
